# Supplementary material for: A general approach to detecting migration events in digital trace data
Source: PLOS journal article supplement (doi:10.1371/journal.pone.0239408), 2020-10-02
Supplement: S5 (10.1371/journal.pone.0239408.s005) [file journal.pone.0239408.s005]

**Table S1: A full inventory of the prior work using trace data to study migration.**

| Paper                         | Data                               | Method to identify home                                                                                                                                                                                                                  | Method to identify migrants                                                                                           |
|-------------------------------|------------------------------------|------------------------------------------------------------------------------------------------------------------------------------------------------------------------------------------------------------------------------------------|-----------------------------------------------------------------------------------------------------------------------|
| Phithakkitnukoon et al. [19]  | CDR                                | Cell tower where the user has the most call activities (10pm to 7pm) each month                                                                                                                                                          | Whose home location changed only once with migration distance of more than 50km                                       |
| Blumenstock [7]               | CDR                                | Monthly center of gravity (COG) whose distance to COG of last month is smaller than a proportion of average radius of gyration (ROG) over a certain number of months.                                                                    | Whose migration distance is greater than a proportion of ROG                                                          |
| Lu et al. [20]                | CDR                                | Monthly modal location where the user has the most call activities                                                                                                                                                                       | Whose home location changed after disasters                                                                           |
| Hong et al. [9]               | CDR                                | Monthly modal location where at least 70% of days appear in each of the three consecutive months. Daily modal cell tower is identified as the location where the user has the most call activities (6pm to 6am Monday through Thursday). | Whose home location changed only once                                                                                 |
| Blumenstock, Chi and Tan [10] | CDR                                | Same monthly modal location in two/three consecutive months, which is calculated based on daily modal location and hourly modal location. Modal location is where the user has the most call activities.                                 | Whose home location changed                                                                                           |
| Hankaew et al. [21]           | CDR                                | Same to Phithakkitnukoon et al. [19]                                                                                                                                                                                                     | Whose home location changed only once (One home location in two months and a new home location in another two months) |
| Yang et al. [57]              | CDR, plus national ID of each user | Birthplace is extracted from national ID; Living city is the location where the phone number was obtained.                                                                                                                               | Whose birthplace is different from the living city                                                                    |
| Büchel et al. [11]            | CDR, plus billing address          | Postcode of the billing address                                                                                                                                                                                                          | Whose home location changed                                                                                           |
| Zagheni et al. [8]            | Geo-tagged tweets                  | Modal country of the user over four months (the modal country should has three times more tweets than the second most frequent country)                                                                                                  | Whose home location changed                                                                                           |
| Fiorio et al. [18]            | Geo-tagged tweets                  | Modal tweet location (US county) of the user over a specific duration (duration is a threshold)                                                                                                                                          | Whose home location changed over an interval (interval is another threshold)                                          |
